# Supplementary material
Source: PubMed Central journal article supplement (PMC2944045)
Supplement: emboj2010174s5.pdf [file emboj2010174s5.pdf]

Manuscript EMBO-2010-74152

## **Phosphorylation of CLIP-170 by Plk1 and CK2 Promotes Timely Formation of Kinetochores-microtubule Attachments**

Hongchang Li, X. Shawn Liu, Xiaoming Yang, Yingmin Wang, Yun Wang, Jerrold Turner

*Corresponding author: Xiaoqi Liu, Purdue University*

---

**Review timeline:**

Submission date:

10 March 2010

Accepted:

07 July 2010

---

An earlier version of this manuscript was submitted to The EMBO Journal and assessed before January 2009. As the original review of the manuscript therefore predates the implementation of The EMBO Journal's transparent review process policy, no Peer Review Process File is available with this article.
